# Supplementary material for: Quantification in cardiovascular magnetic resonance: agreement of software from three different vendors on assessment of left ventricular function, 2D flow and parametric mapping
Source: Springer Nature journal article supplement (doi:10.1186/s12968-019-0522-y), 2019-01-01
Supplement: MOESM1 [file 16497956]

**EF**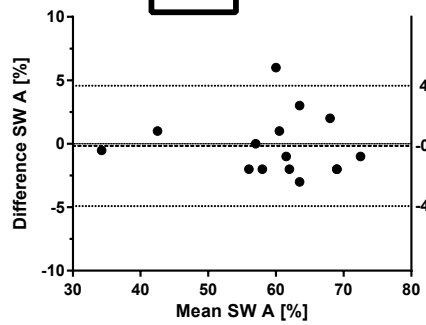**Mass**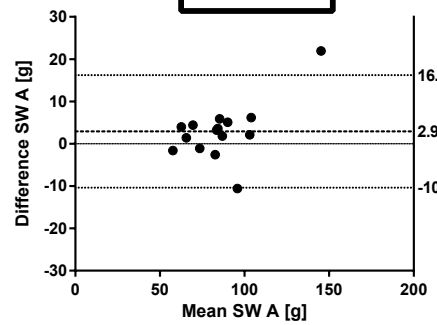**ESV**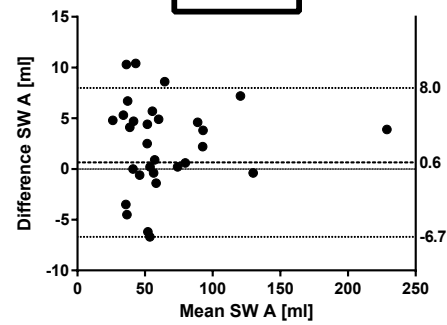**EDV**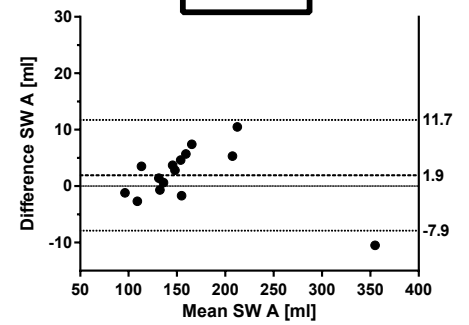**SW A**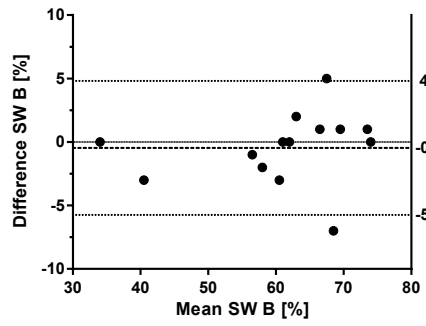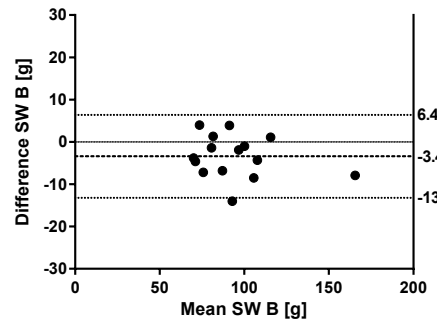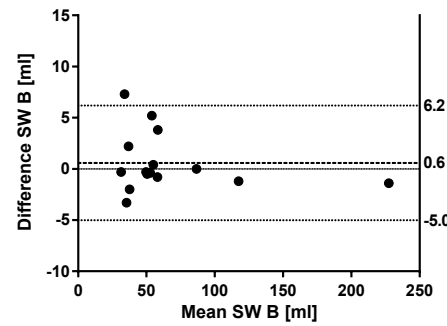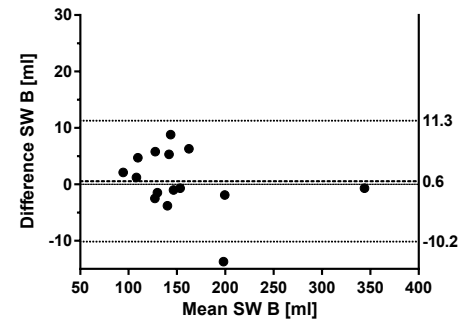**SW B**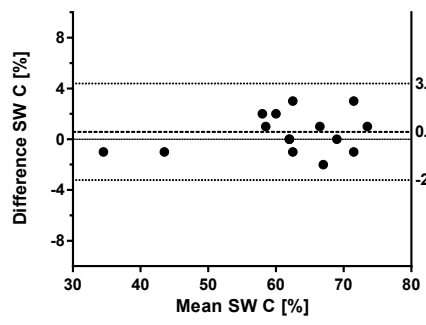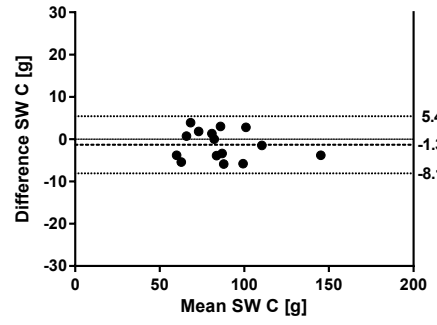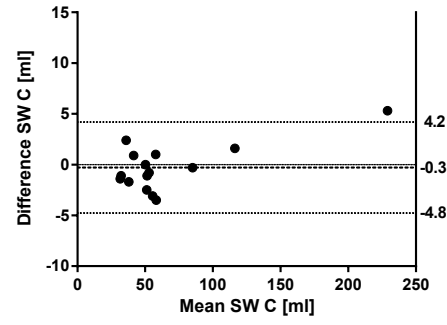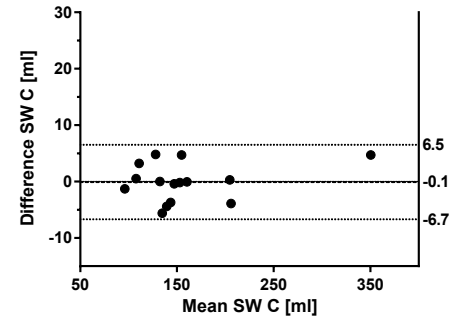**SW C**
